# Supplementary material for: Cell-free synthesis of functional antibody fragments to provide a structural basis for antibody–antigen interaction
Source: PubMed Central journal article supplement (PMC5819829; doi:10.1371/journal.pone.0193158), 2018-02-20
Supplement: pone.0193158.s003.pdf [file pone.0193158.s003.pdf]

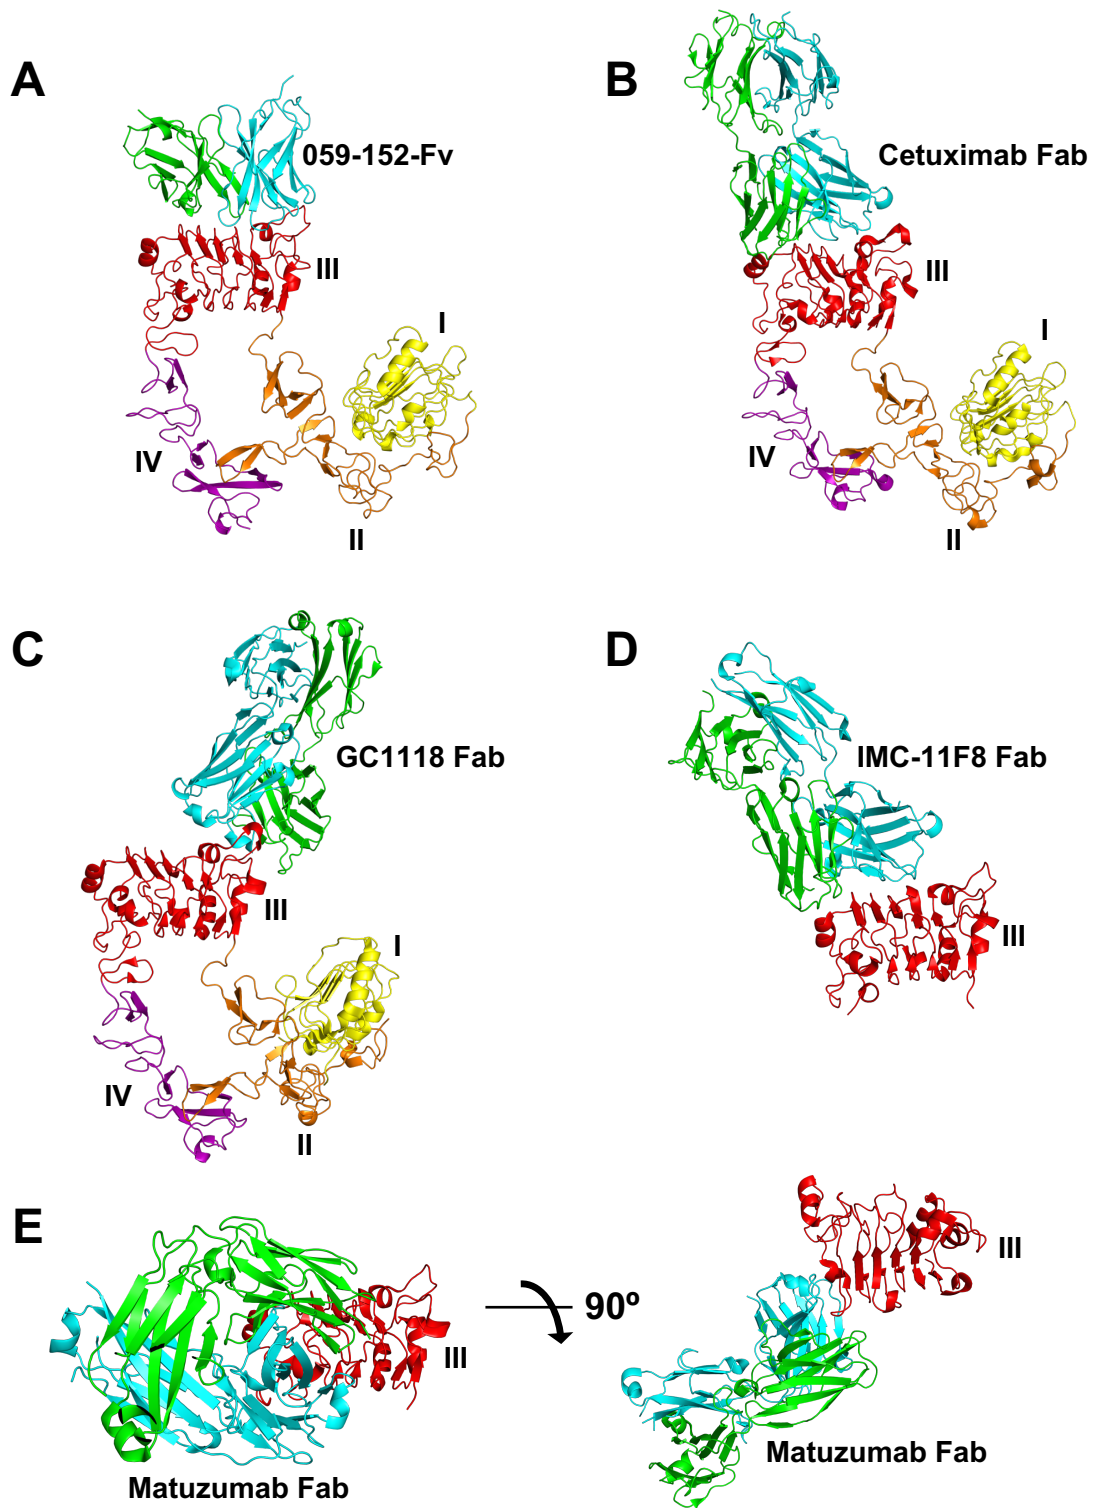

**S3 Fig. Overall structures of anti-EGFR antibody in complex with EGFR-ECD or domain III**
